Although their critique of the original PDP model may be warranted in that the modeling heavily depends on (controversial) assumptions and proper test instructions,<sup>5</sup> the evidence for or against memory function under anesthesia is based on actual response data and not on models. In many of the anesthesia studies cited by Hadzidiakos *et al.*, and many more, response tendencies demonstrated memory for material presented under anesthesia, and the quest for understanding this phenomenon continues.<sup>6</sup> Therefore, it would be wrong to imply or believe that memory function under anesthesia is a spurious phenomenon. Second, the authors failed to include studies that used the extended PDP model and found evidence of automatic memory processes.<sup>2,7</sup> Although one study may not have properly implemented the PDP methodology and produced skewed estimates as a result,<sup>5</sup> another found robust evidence of implicit memory function under seemingly adequate levels of anesthesia based on patient response data and Bucher's PDP model.<sup>2</sup> It is not clear why this evidence was disregarded.

I commend the authors on undertaking their study and welcome their critical examination of a popular yet tricky methodological approach but regret their simplified argument and failure to distinguish between modeled and actual reality.

**Chantal Kerssens, Ph.D.**, Emory University School of Medicine, Atlanta, Georgia. ckersse@emory.edu

## References

1. Hadzidiakos D, Horn D, Buchner A, Rehberg B: Analysis of memory formation during general anesthesia (propofol/remifentanyl) for elective surgery using the process-dissociation procedure. *ANESTHESIOLOGY* 2009; 111:293-301
2. Lubke GH, Kerssens C, Phaf RH, Sebel PS: Dependence of explicit and implicit memory on hypnotic state in trauma patients. *ANESTHESIOLOGY* 1999; 90:670-80
3. Lubke GH, Sebel PS: Awareness and different forms of memory in trauma anaesthesia. *Curr Opin Anaesthesiol* 2000; 13:161-5
4. Kerssens C, Lubke GH, Klein J, van der Woerd A, Bonke B: Memory function during propofol and alfentanil anesthesia: Predictive value of individual differences. *ANESTHESIOLOGY* 2002; 97:382-9
5. Kerssens C: Using the process dissociation procedure: the meaning and value of comparable base rates. *ANESTHESIOLOGY* 2007; 107:172-3
6. Kerssens C, Gaither JR, Sebel PS: Preserved memory function during bispectral index-guided anesthesia with sevoflurane for major orthopedic surgery. *ANESTHESIOLOGY* 2009; 111:518-24
7. Stonell CA, Leslie K, He C, Lee L: No sex differences in memory formation during general anesthesia. *ANESTHESIOLOGY* 2006; 105:920-6

(Accepted for publication December 1, 2009.)

### *In Reply:*

In the reply to our article,<sup>1</sup> Prof. Kerssens makes the central assertion that "Foremost, a model that generates discrepant parameters depending on its assumptions or underlying structure should not invalidate the behavioral findings it at-

tempts to model." This statement contains two common misconceptions.

The first misconception is that "behavioral findings" should be counted as somehow more direct and thus less problematic evidence of something compared with model-based analyses. However, this view fails to take into account the fact that there is no such thing as a model-free measurement. Every analysis makes assumptions about data. The set of these assumptions forms what is called a measurement model. Thus, every analysis is necessarily model based, and the measurement models may be more or less adequate. For instance, the analysis mentioned explicitly by Kerssens on the difference between responses to old material presented under anesthesia *versus* new material not presented before implies a measurement model comprising the assumptions (1) that responses to new words are exclusively based on guessing, (2) that responses to "old" words are exclusively based on memory and guessing, (3) that in the latter case, memory and guessing processes are strictly additive, and which implies (4) that the assumed underlying distribution of the evidence variable is rectangular.<sup>2</sup> All these assumptions may be inadequate. For instance, assumption (1) precludes strategic processing such as generating unusual words, which, however, has been observed before.<sup>3</sup> Assumptions (3) and (4) imply deviations from signal detection theory that have been criticized.<sup>2</sup> Another problem of this model is that "memory" is assumed to be a single homogeneous process that cannot be decomposed further, an assumption that obviously need not be adequate, and one that would not even allow for the simple distinction between automatic and controlled memory processes.

Second, it is not correct to state that we used one model, which generates parameters that depend on the assumptions of the model. Rather, we applied two different measurement models for the process-dissociation procedure, one of which has been shown to be more adequate than the other.<sup>4</sup> Obviously, the better of the two models should be used for data analysis, which is what our analyses clearly confirm. The use of an inadequate model has led researchers (and would have led us) to conclude that there was memory for intraoperative events, which in fact was not there.

A further point is that Kerssens wonders why we did not include studies that used the extended measurement model for the process-dissociation procedure and found evidence of automatic memory processes.<sup>3,5</sup> This point is well taken. We did not include these studies for several reasons. First, these studies were not instances of the point we wished to make, that is, using inadequate measurement models may lead to inadequate conclusions. Second, although we do mention studies that found evidence of memory for intraoperative events (see p. 301 in our target article<sup>1</sup>), it must be realized that our article was not meant to be a meta-analysis in which every single study on this issue was to be included. For instance, we did not include a study by Kerssens *et al.*<sup>6</sup> in which no evidence of memory for intraoperative events was found

using the process-dissociation procedure. Third, an adequate treatment of these studies and their results would have added complexity to an already complex article. Fourth, this is because the data from one of these studies<sup>3</sup> are difficult to evaluate. Although the authors reported probabilities for controlled and automatic processes of approximately 0.04 to be significantly different from zero, our model-based reanalysis suggests that the latter was not the case. The reason for discrepancy is unknown. This leaves one study<sup>5</sup> in which the parameter estimate for automatic memory processes was 0.10, and in this case, the difference from zero was statistically significant in the original study and in our reanalysis. However, note that the size of the parameter estimate is still small. Given this, including this study would not have added information beyond that already conveyed by another study, which we did include and in which there was evidence for a small (0.04) contribution of automatic processes to postoperative memory performance.<sup>7</sup>

In summary, it must be realized that data analyses—even those of raw observable responses—always imply measurement models that need not be adequate in the assumptions they imply about the data. What is more, we believe that we can confidently maintain our original conclusions that the choice of the measurement model is critical when using the process-dissociation procedure. Using an inadequate model may easily lead to spurious “evidence” of memory formation during anesthesia. The extended measurement model should be used instead. By using this model, evidence of memory for intraoperative events seems to be rare at least at “deep” levels of anes-

thetic depth, and where it seems to be present, the probability of memory processes contributing to postoperative memory performance seems to be small.

**Daniel A. Hadzidiakos, M.D.,\* Axel Buchner, Ph.D., Benno Rehberg, M.D.** \*Campus Virchow-Klinikum and Campus Charité Mitte, Charité—Universitaetsmedizin Berlin, Berlin, Germany. daniel.hadzidiakos@charite.de

## References

1. Hadzidiakos D, Horn N, Degener R, Buchner A, Rehberg B: Analysis of memory formation during general anesthesia (propofol/remifentanyl) for elective surgery using the process-dissociation procedure. *ANESTHESIOLOGY* 2009; 111:293-301
2. Macmillan NA, Creelman CD: *Detection Theory: A User's Guide*. New York, Cambridge University Press, 1991, pp 88-116
3. Stonell CA, Leslie K, He C, Lee L: No sex differences in memory formation during general anesthesia. *ANESTHESIOLOGY* 2006; 105:920-6
4. Buchner A, Erdfelder E, Vaterrodt-Plünnecke B: Toward unbiased measurement of conscious and unconscious memory processes within the process dissociation framework. *J Exp Psych Gen* 1995; 124:137-60
5. Lubke GH, Kerssens C, Phaf H, Sebel PS: Dependence of explicit and implicit memory on hypnotic state in trauma patients. *ANESTHESIOLOGY* 1999; 90:670-80
6. Kerssens C, Ouchi T, Sebel PS: No evidence of memory function during anesthesia with propofol or isoflurane with close control of hypnotic state. *ANESTHESIOLOGY* 2005; 102: 57-62
7. Iselin-Chaves IA, Willems SJ, Jermann FC, Forster A, Adam SR, Van der Linden M: Investigation of implicit memory during isoflurane anesthesia for elective surgery using the process dissociation procedure. *ANESTHESIOLOGY* 2005; 103: 925-33

(Accepted for publication December 1, 2009.)
